# Supplementary material for: Intradermal vaccination of HPV-16 E6 synthetic peptides conjugated to an optimized Toll-like receptor 2 ligand shows safety and potent T cell immunogenicity in patients with HPV-16 positive (pre-)malignant lesions
Source: PubMed Central journal article supplement — J Immunother Cancer. 2022 Oct 19;10(10):e005016. doi: 10.1136/jitc-2022-005016 (PMC9582304; doi:10.1136/jitc-2022-005016), 2022-10-19
Supplement: jitc-2022-005016supp001.pdf [file jitc-2022-005016supp001.pdf]

Supplemental Table 1: Stimulation index in proliferation assay

| Dose<br>( $\mu\text{g}/\text{peptide}$ ) | Patient #  | Time point | E6.1        | E6.2        | E6.3 | E6.4       | E7.1       | E7.2         | MRM          |
|------------------------------------------|------------|------------|-------------|-------------|------|------------|------------|--------------|--------------|
| 1                                        | 1          | Baseline   | 0.6         | 0.6         | 0.3  | 0.2        | 0.5        | 0.8          | <b>3.8</b>   |
|                                          |            | Post vac 2 | 0.5         | 1.1         | 0.3  | 0.3        | 0.4        | 0.6          | <b>4.8</b>   |
|                                          |            | Post vac 3 | 0.7         | 2.1         | 0.6  | 0.5        | 0.5        | 0.9          | <b>17.4</b>  |
|                                          |            | Follow-up  | 0.6         | 1.0         | 0.4  | 0.5        | 0.4        | 0.5          | <b>17.8</b>  |
|                                          | 2          | Baseline   | 1.7         | <b>3.8</b>  | 0.9  | <b>6.0</b> | <b>8.1</b> | 1.9          | <b>71.3</b>  |
|                                          |            | Post vac 2 | 1.3         | <b>5.0</b>  | 1.4  | <b>8.1</b> | 2.3        | 1.7          | <b>241.0</b> |
|                                          |            | Post vac 3 | 1.2         | 2.4         | 1.1  | <b>3.9</b> | 2.3        | 1.7          | <b>240.4</b> |
|                                          |            | Follow-up  | 0.9         | 1.5         | 0.4  | 1.5        | 1.0        | 1.0          | <b>92.5</b>  |
|                                          | 3          | Baseline   | 0.7         | 1.3         | 0.4  | 2.8        | 1.6        | 1.3          | <b>65.8</b>  |
|                                          |            | Post vac 2 | 0.4         | 0.6         | 0.2  | 0.3        | 0.5        | 0.4          | <b>14.1</b>  |
|                                          |            | Post vac 3 | <b>4.9</b>  | <b>10.0</b> | 1.6  | 3.0        | 3.0        | <b>4.3</b>   | <b>164.6</b> |
|                                          |            | Follow-up  | 2.8         | 2.3         | 1.1  | 1.7        | 2.3        | 2.0          | <b>54.2</b>  |
|                                          | 4          | Baseline   | 0.7         | 0.6         | 0.7  | 0.5        | 0.7        | 0.7          | 0.7          |
|                                          |            | Post vac 2 |             |             |      |            |            |              |              |
|                                          |            | Post vac 3 | 0.2         | 0.4         | 0.3  | 0.2        | 0.4        | 0.4          | <b>4.2</b>   |
|                                          |            | Follow-up  | 0.3         | 0.5         | 0.3  | 0.2        | 0.5        | 0.5          | <b>5.6</b>   |
| 5                                        | Baseline   | 0.8        | 0.7         | 0.9         | 1.1  | 0.9        | 0.9        | 1.5          |              |
|                                          | Post vac 2 | 0.9        | 0.8         | 0.7         | 0.9  | 1.0        | 0.9        | 1.5          |              |
|                                          | Post vac 3 | 0.8        | 0.9         | 0.6         | 0.7  | 0.6        | 1.0        | 2.1          |              |
|                                          | Follow-up  | 1.1        | 1.0         | 0.6         | 0.6  | 0.7        | 1.2        | <b>7.6</b>   |              |
| 6                                        | Baseline   | 0.4        | 2.4         | 0.3         | 0.3  | 0.4        | 2.5        | <b>4.6</b>   |              |
|                                          | Post vac 2 | 0.2        | 0.6         | 0.3         | 0.1  | 0.3        | 0.5        | <b>4.8</b>   |              |
|                                          | Post vac 3 | 0.6        | 2.4         | 0.6         | 0.6  | 0.8        | 2.2        | <b>99.0</b>  |              |
|                                          | Follow-up  | 1.5        | 2.3         | 1.1         | 1.1  | 1.1        | 2.0        | <b>181.7</b> |              |
| 5                                        | 7          | Baseline   | 0.5         | 0.9         | 0.3  | 0.5        | 0.4        | 0.9          | <b>22.2</b>  |
|                                          |            | Post vac 2 | 0.2         | 0.4         | 0.2  | 0.2        | 0.4        | 0.4          | <b>13.7</b>  |
|                                          |            | Post vac 3 | 0.2         | 0.6         | 0.2  | 0.3        | 0.3        | 0.5          | <b>35.9</b>  |
|                                          |            | Follow-up  | 0.6         | 0.8         | 0.6  | 0.4        | 0.6        | 1.1          | <b>33.0</b>  |
|                                          | 8          | Baseline   | 1.0         | <b>3.0</b>  | 1.1  | 0.8        | 0.9        | 1.8          | <b>54.8</b>  |
|                                          |            | Post vac 2 | 1.3         | <b>3.5</b>  | 2.9  | 2.2        | 1.0        | 2.3          | <b>374.9</b> |
|                                          |            | Post vac 3 | 1.2         | 2.1         | 1.2  | 1.7        | 1.1        | 1.4          | <b>11.3</b>  |
|                                          |            | Follow-up  | 1.3         | 1.7         | 1.6  | 1.3        | 1.5        | 1.5          | <b>99.1</b>  |
|                                          | 9          | Baseline   | 0.8         | 1.4         | 0.6  | 0.8        | 0.6        | 0.8          | <b>43.7</b>  |
|                                          |            | Post vac 2 | 2.6         | <b>8.3</b>  | 0.8  | 0.9        | 0.7        | 1.5          | <b>134.8</b> |
|                                          |            | Post vac 3 | 0.7         | 2.7         | 1.1  | 0.9        | 1.0        | 1.3          | <b>33.4</b>  |
|                                          |            | Follow-up  | 1.0         | 1.9         | 0.9  | 1.0        | 0.7        | 1.6          | <b>60.6</b>  |
| 10                                       | Baseline   | 1.1        | 0.8         | 0.3         | 0.2  | 0.4        | 1.7        | <b>51.1</b>  |              |
|                                          | Post vac 2 | 0.5        | 1.1         | 0.3         | 0.4  | 0.2        | 0.9        | <b>71.9</b>  |              |
|                                          | Post vac 3 | 0.5        | 1.9         | 0.7         | 0.3  | 0.5        | 1.0        | <b>133.3</b> |              |
|                                          | Follow-up  | 0.8        | 1.2         | 0.7         | 0.9  | 1.0        | 1.2        | <b>115.3</b> |              |
| 11                                       | Baseline   | 1.2        | 5.1         | 0.2         | 0.2  | 0.4        | 1.1        | <b>17.2</b>  |              |
|                                          | Post vac 2 | 0.8        | <b>4.8</b>  | 1.5         | 0.8  | 0.5        | 1.9        | <b>23.9</b>  |              |
|                                          | Post vac 3 | 3.6        | <b>11.8</b> | 1.7         | 1.7  | 1.1        | 2.7        | <b>37.7</b>  |              |
|                                          | Follow-up  | 1.2        | <b>5.0</b>  | 0.9         | 0.7  | 0.8        | 2.4        | <b>127.5</b> |              |
| 12                                       | Baseline   | 1.4        | <b>4.0</b>  | 1.3         | 1.4  | 1.3        | 1.8        | <b>47.8</b>  |              |
|                                          | Post vac 2 | 1.3        | <b>3.2</b>  | 0.7         | 1.9  | 1.5        | 1.4        | <b>73.0</b>  |              |
|                                          | Post vac 3 | 1.5        | <b>4.5</b>  | 1.0         | 1.2  | 1.1        | 1.5        | <b>60.6</b>  |              |
|                                          | Follow-up  | 1.1        | <b>3.8</b>  | 0.9         | 0.6  | 1.0        | 1.1        | <b>89.4</b>  |              |

| Dose<br>( $\mu\text{g}/\text{peptide}$ ) | Patient #  | Time point | E6.1        | E6.2        | E6.3        | E6.4        | E7.1 | E7.2        | MRM          |
|------------------------------------------|------------|------------|-------------|-------------|-------------|-------------|------|-------------|--------------|
| 20                                       | 13         | Baseline   | 0.7         | 1.0         | 0.4         | 0.5         | 0.5  | 1.1         | <b>20.3</b>  |
|                                          |            | Post vac 2 | 0.7         | 1.8         | 0.6         | 0.4         | 0.5  | 0.7         | <b>15.5</b>  |
|                                          |            | Post vac 3 | <b>4.7</b>  | 1.6         | 1.3         | 0.8         | 1.4  | 1.9         | <b>5.9</b>   |
|                                          |            | Follow-up  | 0.9         | 1.9         | 0.9         | 0.9         | 0.9  | 1.0         | <b>17.4</b>  |
|                                          | 14         | Baseline   | 0.3         | 0.6         | 0.2         | 0.1         | 0.5  | 0.5         | 1.8          |
|                                          |            | Post vac 2 | 0.5         | 1.6         | 0.6         | 0.8         | 0.6  | 0.9         | 2.9          |
|                                          |            | Post vac 3 | 0.3         | 0.8         | 0.6         | 0.4         | 0.9  | 0.6         | 2.4          |
|                                          |            | Follow-up  | 0.4         | 0.8         | 0.4         | 0.3         | 0.4  | 0.6         | <b>5.1</b>   |
|                                          | 15         | Baseline   | 0.5         | 1.1         | 0.5         | 1.2         | 0.6  | 0.7         | <b>7.6</b>   |
|                                          |            | Post vac 2 | 1.1         | <b>8.9</b>  | 2.2         | <b>10.7</b> | 0.8  | 1.6         | <b>32.0</b>  |
|                                          |            | Post vac 3 | 1.4         | <b>7.7</b>  | 1.6         | <b>9.9</b>  | 0.8  | 1.0         | <b>32.4</b>  |
|                                          |            | Follow-up  | 0.9         | 2.5         | 1.1         | 1.5         | 1.0  | 1.2         | <b>57.5</b>  |
|                                          | 16         | Baseline   | 0.6         | 1.4         | 0.3         | 1.3         | 0.9  | 1.1         | 2.3          |
|                                          |            | Post vac 2 | 0.3         | 1.2         | 0.4         | 2.8         | 0.6  | 0.9         | 1.8          |
|                                          |            | Post vac 3 | 0.4         | 0.5         | 0.3         | 0.8         | 0.3  | 0.6         | 2.2          |
|                                          |            | Follow-up  | 0.4         | 1.1         | 0.4         | 0.8         | 0.5  | 0.8         | 2.8          |
|                                          | 17         | Baseline   | 0.4         | 0.9         | 0.5         | 0.4         | 0.8  | 0.7         | <b>31.9</b>  |
|                                          |            | Post vac 2 | 0.7         | <b>9.7</b>  | <b>3.6</b>  | <b>8.2</b>  | 0.8  | 1.2         | <b>22.7</b>  |
|                                          |            | Post vac 3 | 0.8         | <b>21.2</b> | <b>9.2</b>  | <b>9.7</b>  | 1.2  | 0.6         | <b>36.6</b>  |
|                                          |            | Follow-up  | 0.8         | <b>5.7</b>  | <b>5.0</b>  | <b>7.9</b>  | 1.0  | 1.3         | <b>11.0</b>  |
| 18                                       | Baseline   |            |             |             |             |             |      |             |              |
|                                          | Post vac 2 | 0.8        | 0.8         | 0.8         | 1.0         | 0.9         | 1.0  | <b>5.2</b>  |              |
|                                          | Post vac 3 |            |             |             |             |             |      |             |              |
|                                          | Follow-up  | 0.3        | 0.5         | 0.3         | 0.2         | 0.4         | 0.7  | <b>4.3</b>  |              |
| 50                                       | 19         | Baseline   |             |             |             |             |      |             |              |
|                                          |            | Post vac 2 | 1.3         | <b>75.6</b> | <b>12.7</b> | <b>48.8</b> | 1.1  | 1.3         | <b>115.2</b> |
|                                          |            | Post vac 3 | 0.8         | <b>57.1</b> | <b>8.7</b>  | <b>35.8</b> | 1.0  | 1.1         | <b>64.1</b>  |
|                                          |            | Follow-up  | 1.0         | <b>31.0</b> | <b>13.4</b> | <b>22.7</b> | 1.1  | 1.0         | <b>26.9</b>  |
|                                          | 20         | Baseline   | 1.1         | 2.6         | 0.8         | 1.0         | 1.0  | 1.6         | <b>7.7</b>   |
|                                          |            | Post vac 2 | 1.0         | 2.4         | 1.1         | 1.1         | 0.9  | 1.6         | <b>15.2</b>  |
|                                          |            | Post vac 3 | 0.9         | <b>3.0</b>  | 1.4         | 1.7         | 1.0  | 1.4         | <b>14.2</b>  |
|                                          |            | Follow-up  | 1.1         | 2.0         | 1.5         | 0.9         | 1.0  | 1.5         | <b>39.3</b>  |
|                                          | 21         | Baseline   | 0.6         | 0.8         | 0.6         | 0.3         | 0.6  | 1.3         | 0.9          |
|                                          |            | Post vac 2 | 0.5         | 2.3         | 0.4         | 1.3         | 0.5  | 0.9         | 1.1          |
|                                          |            | Post vac 3 | 1.3         | <b>4.6</b>  | 1.3         | <b>4.3</b>  | 1.4  | 1.8         | 2.1          |
|                                          |            | Follow-up  | 2.4         | <b>19.2</b> | 2.7         | <b>15.7</b> | 2.8  | <b>3.6</b>  | 3.0          |
|                                          | 22         | Baseline   |             |             |             |             |      |             |              |
|                                          |            | Post vac 2 | 0.9         | 2.3         | 0.9         | 1.0         | 1.1  | 0.7         | <b>13.3</b>  |
|                                          |            | Post vac 3 | 0.9         | 1.7         | 1.0         | 1.0         | 1.0  | 1.2         | 2.0          |
|                                          |            | Follow-up  | 1.3         | 2.2         | 1.2         | 1.1         | 1.0  | 1.4         | 1.8          |
|                                          | 23         | Baseline   | 1.1         | 1.2         | 1.2         | 0.6         | 0.8  | 1.3         | <b>4.2</b>   |
|                                          |            | Post vac 2 | 1.1         | <b>7.6</b>  | 2.7         | <b>8.7</b>  | 1.1  | 1.4         | <b>3.2</b>   |
|                                          |            | Post vac 3 | 1.1         | <b>4.0</b>  | 1.8         | 2.9         | 1.1  | 1.2         | 2.5          |
|                                          |            | Follow-up  | 1.3         | <b>3.8</b>  | 2.6         | <b>3.8</b>  | 1.4  | 1.5         | <b>3.6</b>   |
| 24                                       | Baseline   | 0.9        | 1.7         | 1.0         | 1.8         | 0.8         | 1.1  | <b>13.1</b> |              |
|                                          | Post vac 2 | 1.2        | <b>6.3</b>  | 2.3         | <b>7.8</b>  | 1.8         | 1.6  | <b>26.4</b> |              |
|                                          | Post vac 3 | 1.0        | <b>5.1</b>  | 1.6         | <b>8.9</b>  | 1.2         | 1.4  | <b>14.6</b> |              |
|                                          | Follow-up  | 1.1        | 1.7         | 1.3         | <b>3.1</b>  | 1.1         | 1.0  | <b>3.5</b>  |              |
| 25                                       | Baseline   | 1.0        | 1.4         | 0.9         | 1.0         | 1.1         | 1.3  | <b>51.3</b> |              |
|                                          | Post vac 2 | 1.3        | <b>20.4</b> | <b>5.1</b>  | <b>14.0</b> | 1.4         | 1.5  | <b>41.4</b> |              |
|                                          | Post vac 3 | 0.9        | <b>5.5</b>  | <b>3.7</b>  | <b>4.2</b>  | 1.1         | 1.0  | <b>5.8</b>  |              |
|                                          | Follow-up  | 1.1        | <b>6.3</b>  | <b>4.0</b>  | <b>4.2</b>  | 1.3         | 1.1  | <b>9.3</b>  |              |

The vaccine peptides E6<sub>71-95</sub> and E6<sub>127-158</sub>) are represented in peptide pool E6.2 (covering E6<sub>41-95</sub>) and E6.4 (covering E6<sub>109-158</sub>), however, peptide pool E6.3 (covering E6<sub>85-122</sub>) also partly harbors the sequences of 11 amino acids of the first vaccine peptide. The grey shaded peptide pools indicate therefore the peptide pools covering the vaccine peptides. A value in bold indicates a positive response (a stimulation index of at least 3 and 6 out of 8 wells above the cut-off value). Memory response mix (MRM) is a mixture of common microbial recall antigens.

Supplemental Table 2: Cytokine production in proliferation assay.

| Dose<br>( $\mu\text{g}/\text{peptide}$ ) | Patient #    | Time point | Cytokine     | E6.1     | E6.2         | E6.3 | E6.4  | E7.1  | E7.2 | MRM           |   |               |
|------------------------------------------|--------------|------------|--------------|----------|--------------|------|-------|-------|------|---------------|---|---------------|
| 1                                        | 1            | Baseline   | IFN $\gamma$ | 0        | 0            | 0    | 0     | 0     | 0    | 10.27         |   |               |
|                                          |              |            | TNF $\alpha$ | 0        | 0            | 0    | 0     | 0     | 0    | 10.60         |   |               |
|                                          |              |            | IL-10        | 0        | 0            | 0    | 0     | 0     | 0    | 0             |   |               |
|                                          |              |            | IL-5         | 0        | 0            | 0    | 0     | 0     | 0    | <b>101.68</b> |   |               |
|                                          |              | Post vac 2 | IFN $\gamma$ | 0        | 0            | 0    | 0     | 0     | 0    | 3.46          |   |               |
|                                          |              |            | TNF $\alpha$ | 0        | 0            | 0    | 0     | 0     | 0    | 5.64          |   |               |
|                                          |              |            | IL-10        | 0        | 0            | 0    | 0     | 0     | 0    | 0.25          |   |               |
|                                          |              |            | IL-5         | 0        | 0            | 0    | 0     | 0     | 0    | 15.79         |   |               |
|                                          |              | Post vac 3 | IFN $\gamma$ | 0        | 0            | 0    | 0     | 0     | 0    | 11.34         |   |               |
|                                          |              |            | TNF $\alpha$ | 0        | 0            | 0    | 0     | 0     | 0    | 9.85          |   |               |
|                                          |              |            | IL-10        | 0        | 0            | 0    | 0     | 0     | 0    | 0             |   |               |
|                                          |              |            | IL-5         | 0        | 0.27         | 0    | 0     | 0     | 0    | <b>69.16</b>  |   |               |
|                                          |              | Follow-up  | IFN $\gamma$ | 0        | 0            | 0    | 0     | 0     | 0    | <b>50.31</b>  |   |               |
|                                          |              |            | TNF $\alpha$ | 0        | 0            | 0    | 0     | 0     | 0    | <b>28.58</b>  |   |               |
|                                          |              |            | IL-10        | 0        | 0            | 0    | 0     | 0     | 0    | 3.83          |   |               |
|                                          |              |            | IL-5         | 0        | 0            | 0    | 0     | 0     | 0    | <b>64.74</b>  |   |               |
|                                          |              | 2          | 2            | Baseline | IFN $\gamma$ | 0    | 0     | 0     | 4.41 | 17.16         | 0 | <b>72.53</b>  |
|                                          |              |            |              |          | TNF $\alpha$ | 0    | 0     | 0     | 0    | 0             | 0 | 11.75         |
| IL-10                                    | 0            |            |              |          | 0            | 0    | 0.36  | 1.83  | 0.60 | 2.09          |   |               |
| IL-5                                     | 0            |            |              |          | 0            | 0    | 0     | 0     | 0    | <b>24.20</b>  |   |               |
| Post vac 2                               | IFN $\gamma$ |            |              | 0        | 0            | 0    | 12.80 | 0     | 0    | <b>948.78</b> |   |               |
|                                          | TNF $\alpha$ |            |              | 0        | 0            | 0    | 0     | 0     | 0    | <b>124.37</b> |   |               |
|                                          | IL-10        |            |              | 0        | 0            | 0    | 0     | 0     | 1.38 | 2.95          |   |               |
|                                          | IL-5         |            |              | 0        | 0            | 0    | 0     | 0     | 0    | <b>36.03</b>  |   |               |
| Post vac 3                               | IFN $\gamma$ |            |              | 0        | 0            | 0    | 22.99 | 15.52 | 0    | <b>896.65</b> |   |               |
|                                          | TNF $\alpha$ |            |              | 0        | 0            | 0    | 0     | 0     | 0    | <b>261.43</b> |   |               |
|                                          | IL-10        |            |              | 0        | 0            | 0    | 0     | 0     | 0.48 | 0             |   |               |
|                                          | IL-5         |            |              | 0        | 0            | 0    | 0     | 0     | 0    | <b>77.02</b>  |   |               |
| Follow-up                                | IFN $\gamma$ |            |              | 0        | 0            | 0    | 0     | 0     | 0    | 44.52         |   |               |
|                                          | TNF $\alpha$ |            |              | 0        | 0            | 0    | 0     | 0     | 0    | 19.59         |   |               |
|                                          | IL-10        |            |              | 0        | 0            | 0    | 0     | 0     | 0    | 0             |   |               |
|                                          | IL-5         |            |              | 0        | 0            | 0    | 0     | 0     | 0    | <b>34.81</b>  |   |               |
| 3                                        | 3            |            |              | Baseline | IFN $\gamma$ | 0    | 0     | 0     | 0    | 0             | 0 | <b>360.39</b> |
|                                          |              |            |              |          | TNF $\alpha$ | 0    | 0     | 0     | 0    | 0             | 0 | <b>135.62</b> |
|                                          |              | IL-10      | 0            |          | 0            | 0    | 0     | 0     | 0    | 7.75          |   |               |
|                                          |              | IL-5       | 0            |          | 0            | 0    | 0     | 0     | 0    | <b>332.86</b> |   |               |
|                                          |              | Post vac 2 | IFN $\gamma$ | 0        | 0            | 0    | 0     | 0     | 0    | <b>253.3</b>  |   |               |
|                                          |              |            | TNF $\alpha$ | 0        | <b>0</b>     | 0    | 0     | 0     | 0    | <b>63.00</b>  |   |               |
|                                          |              |            | IL-10        | 0        | 1.06         | 0    | 0     | 0     | 0    | 0.15          |   |               |
|                                          |              |            | IL-5         | 0        | 0            | 0    | 0     | 0     | 0    | <b>163.99</b> |   |               |
|                                          |              | Post vac 3 | IFN $\gamma$ | 0        | 0            | 0    | 0     | 0     | 0    | <b>269.36</b> |   |               |
|                                          |              |            | TNF $\alpha$ | 0        | 0            | 0    | 0     | 0     | 0    | <b>43.12</b>  |   |               |
|                                          |              |            | IL-10        | 0        | 0.81         | 0    | 0     | 0     | 0.15 | 4.67          |   |               |
|                                          |              |            | IL-5         | 0        | 0.56         | 0    | 0     | 0     | 0    | <b>116.75</b> |   |               |
|                                          |              | Follow-up  | IFN $\gamma$ | 0        | 0            | 0    | 0     | 0     | 0    | <b>393.79</b> |   |               |
|                                          |              |            | TNF $\alpha$ | 0        | 0            | 0    | 0     | 0     | 0    | <b>95.09</b>  |   |               |
|                                          |              |            | IL-10        | 0        | 0            | 0    | 0     | 0     | 2.67 | 2.67          |   |               |
|                                          |              |            | IL-5         | 0        | 0            | 0    | 0     | 0     | 0    | <b>124.43</b> |   |               |

| Dose<br>( $\mu\text{g}/\text{peptide}$ ) | Patient #    | Time point | Cytokine     | E6.1     | E6.2         | E6.3 | E6.4         | E7.1 | E7.2 | MRM            |               |      |
|------------------------------------------|--------------|------------|--------------|----------|--------------|------|--------------|------|------|----------------|---------------|------|
| 1                                        | 4            | Baseline   | IFN $\gamma$ | 0        | 0            | 0    | 0            | 0    | 0    | 0              |               |      |
|                                          |              |            | TNF $\alpha$ | 0        | 0            | 0    | 0            | 0    | 0    | 0              |               |      |
|                                          |              |            | IL-10        | 0        | 0            | 0    | 0            | 0    | 0    | 0              |               |      |
|                                          |              |            | IL-5         | 0        | 0            | 0    | 0            | 0    | 0    | 0              |               |      |
|                                          |              | Post vac 3 | IFN $\gamma$ | 0        | 0            | 0    | 0            | 0    | 0    | 5.97           |               |      |
|                                          |              |            | TNF $\alpha$ | 0        | 0            | 0    | 0            | 0    | 0    | 6.43           |               |      |
|                                          |              |            | IL-10        | 0        | 3.27         | 0    | 0            | 0    | 0    | 0              |               |      |
|                                          |              | Follow-up  | IL-5         | 0        | 0            | 0    | 0            | 0    | 0    | 0              | <b>101.68</b> |      |
|                                          |              |            | IFN $\gamma$ | 0        | 0            | 0    | 0            | 0    | 0    | 7.25           |               |      |
|                                          |              |            | TNF $\alpha$ | 0        | 0            | 0    | 0            | 0    | 0    | 9.25           |               |      |
|                                          |              |            | IL-10        | 2.82     | 5.09         | 2.7  | 1.86         | 3.98 | 3.20 | 2.58           |               |      |
|                                          |              |            | IL-5         | 0        | 0            | 0    | 0            | 0    | 0    | <b>38.14</b>   |               |      |
|                                          |              | 5          | 5            | Baseline | IFN $\gamma$ | 0    | 0            | 0    | 0    | 0              | 0             | 0    |
|                                          |              |            |              |          | TNF $\alpha$ | 0    | 0            | 0    | 0    | 0              | 0             | 0    |
|                                          |              |            |              |          | IL-10        | 0    | 0            | 0    | 0    | 0              | 0             | 6.21 |
| IL-5                                     | 0            |            |              |          | 0            | 0    | 0            | 0    | 0    | 7.8            |               |      |
| Post vac 2                               | IFN $\gamma$ |            |              | 0        | 0            | 0    | 0            | 0    | 0    | 0              |               |      |
|                                          | TNF $\alpha$ |            |              | 0        | 0            | 0    | 0            | 0    | 0    | 0              |               |      |
|                                          | IL-10        |            |              | 0        | 0            | 0    | 0            | 0    | 0    | 0              |               |      |
| Post vac 3                               | IL-5         |            |              | 0        | 0            | 0    | 0            | 0    | 2.29 | <b>42.68</b>   |               |      |
|                                          | IFN $\gamma$ |            |              | 0        | 0            | 0    | 0            | 0    | 0    | 0              |               |      |
|                                          | TNF $\alpha$ |            |              | 0        | 0            | 0    | 0            | 0    | 0    | 1.01           |               |      |
| Follow-up                                | IL-10        |            |              | 0        | 0            | 0    | 0            | 0    | 0    | 0              |               |      |
|                                          | IL-5         |            |              | 0        | 0            | 0    | 0            | 0    | 0    | <b>45.13</b>   |               |      |
|                                          | IFN $\gamma$ |            |              | 0        | 0            | 0    | 0            | 0    | 0    | 9.93           |               |      |
|                                          | TNF $\alpha$ |            |              | 0        | 0            | 0    | 0            | 0    | 0    | 11.75          |               |      |
|                                          | IL-10        |            |              | 1.32     | 0.18         | 0    | 0            | 0    | 0.55 | 0              |               |      |
| IL-5                                     | 0            | 0          | 0            | 0        | 0            | 0    | <b>38.14</b> |      |      |                |               |      |
| 6                                        | 6            | Baseline   | IFN $\gamma$ | 0        | 0            | 0    | 0            | 0    | 0    | <b>353.33</b>  |               |      |
|                                          |              |            | TNF $\alpha$ | 0        | 0            | 0    | 0            | 0    | 0    | <b>24.55</b>   |               |      |
|                                          |              |            | IL-10        | 0        | 1.00         | 0    | 0            | 0    | 1.52 | 0              |               |      |
|                                          |              |            | IL-5         | 0        | 0            | 0    | 0            | 0    | 0    | <b>61.39</b>   |               |      |
|                                          |              | Post vac 2 | IFN $\gamma$ | 0        | 0            | 0    | 0            | 0    | 0    | <b>1223.20</b> |               |      |
|                                          |              |            | TNF $\alpha$ | 0        | 0            | 0    | 0            | 0    | 0    | <b>89.01</b>   |               |      |
|                                          |              |            | IL-10        | 0        | 0            | 0    | 0            | 0    | 0    | 0              |               |      |
|                                          |              | Post vac 3 | IL-5         | 0        | 0            | 0    | 0            | 0    | 0    | <b>77.02</b>   |               |      |
|                                          |              |            | IFN $\gamma$ | 0        | 0            | 0    | 0            | 0    | 0    | <b>2467.81</b> |               |      |
|                                          |              |            | TNF $\alpha$ | 0        | 0            | 0    | 0            | 0    | 0    | <b>156.91</b>  |               |      |
|                                          |              | Follow-up  | IL-10        | 0        | 1.16         | 0    | 0            | 0    | 2.29 | <b>27.75</b>   |               |      |
|                                          |              |            | IL-5         | 0        | 0            | 0    | 0            | 0    | 0    | <b>25.39</b>   |               |      |
|                                          |              |            | IFN $\gamma$ | 0        | 0            | 0    | 0            | 0    | 0    | <b>939.89</b>  |               |      |
|                                          |              |            | TNF $\alpha$ | 0        | 0            | 0    | 0            | 0    | 0    | <b>90.20</b>   |               |      |
|                                          |              |            | IL-10        | 0        | 2.11         | 0    | 0            | 0    | 2.65 | 9.13           |               |      |
| IL-5                                     | 0            | 0          | 0            | 0        | 0            | 0    | 5.85         |      |      |                |               |      |

| Dose<br>( $\mu\text{g}/\text{peptide}$ ) | Patient # | Time point | Cytokine     | E6.1 | E6.2  | E6.3 | E6.4         | E7.1 | E7.2 | MRM            |
|------------------------------------------|-----------|------------|--------------|------|-------|------|--------------|------|------|----------------|
| 5                                        | 7         | Baseline   | IFN $\gamma$ | 0    | 0     | 0    | 0            | 0    | 0    | 9.97           |
|                                          |           |            | TNF $\alpha$ | 0    | 0     | 0    | 0            | 0    | 0    | 10.57          |
|                                          |           |            | IL-10        | 0    | 0     | 0    | 0            | 0    | 0    | 9.91           |
|                                          |           |            | IL-5         | 0    | 0     | 0    | 0            | 0    | 0    | <b>391.75</b>  |
|                                          |           | Post vac 2 | IFN $\gamma$ | 0    | 0     | 0    | 0            | 0    | 0    | 20.42          |
|                                          |           |            | TNF $\alpha$ | 0    | 0     | 0    | 0            | 0    | 0    | 17.06          |
|                                          |           |            | IL-10        | 0    | 0     | 0    | 0            | 0    | 0.94 | 0              |
|                                          |           | Post vac 3 | IL-5         | 0    | 0     | 0    | 0            | 0    | 0    | <b>450.92</b>  |
|                                          |           |            | IFN $\gamma$ | 0    | 0     | 0    | 0            | 0    | 0    | <b>72.39</b>   |
|                                          |           |            | TNF $\alpha$ | 0    | 0     | 0    | 0            | 0    | 0    | <b>63.39</b>   |
|                                          |           | Follow-up  | IL-10        | 0    | 0     | 0    | 0            | 0    | 0    | 0              |
|                                          |           |            | IL-5         | 0    | 0     | 0    | 0            | 0    | 0    | <b>341.35</b>  |
|                                          |           |            | IFN $\gamma$ | 0    | 0     | 0    | 0            | 0    | 0    | 2.99           |
|                                          |           |            | TNF $\alpha$ | 0    | 0     | 0    | 0            | 0    | 0    | 5.48           |
|                                          |           |            | IL-10        | 0    | 0     | 0    | 0            | 0    | 0    | 0              |
| 8                                        | 8         | Baseline   | IFN $\gamma$ | 0    | 0     | 0    | 0            | 0    | 0    | 8.81           |
|                                          |           |            | TNF $\alpha$ | 0    | 0     | 0    | 0            | 0    | 0    | 0              |
|                                          |           |            | IL-10        | 0    | 0     | 0    | 0            | 0    | 0    | 0.77           |
|                                          |           |            | IL-5         | 0    | 0     | 0    | 0            | 0    | 0    | <b>25.11</b>   |
|                                          |           | Post vac 2 | IFN $\gamma$ | 0    | 0     | 0    | 0            | 0    | 0    | <b>1933.82</b> |
|                                          |           |            | TNF $\alpha$ | 0    | 0     | 0    | 0            | 0    | 0    | <b>244.00</b>  |
|                                          |           |            | IL-10        | 0    | 3.44  | 1.08 | 0            | 0    | 1.18 | 5.62           |
|                                          |           | Post vac 3 | IL-5         | 0    | 0     | 0    | 0            | 0    | 0    | 16.58          |
|                                          |           |            | IFN $\gamma$ | 0    | 0     | 0    | 0            | 0    | 0    | <b>253.78</b>  |
|                                          |           |            | TNF $\alpha$ | 0    | 0     | 0    | 0            | 0    | 0    | 15.9           |
|                                          |           | Follow-up  | IL-10        | 1.80 | 19.85 | 1.98 | 9.14         | 1.29 | 8.90 | 0.47           |
|                                          |           |            | IL-5         | 0    | 0     | 0    | 0            | 0    | 0    | <b>29.48</b>   |
|                                          |           |            | IFN $\gamma$ | 0    | 0     | 0    | 0            | 0    | 0    | <b>608.28</b>  |
|                                          |           |            | TNF $\alpha$ | 0    | 0     | 0    | 0            | 0    | 0    | <b>75.94</b>   |
|                                          |           |            | IL-10        | 0    | 0.19  | 0    | 0            | 0    | 0    | 0              |
| 9                                        | 9         | Baseline   | IFN $\gamma$ | 0    | 0     | 0    | 0            | 0    | 0    | 20.83          |
|                                          |           |            | TNF $\alpha$ | 0    | 0     | 0    | 0            | 0    | 0    | 0              |
|                                          |           |            | IL-10        | 0    | 0     | 0    | 0            | 0    | 0    | 3.02           |
|                                          |           |            | IL-5         | 0    | 0     | 0    | 0            | 0    | 0    | <b>40.99</b>   |
|                                          |           | Post vac 2 | IFN $\gamma$ | 0    | 0     | 0    | 0            | 0    | 0    | <b>76.81</b>   |
|                                          |           |            | TNF $\alpha$ | 0    | 0     | 0    | 0            | 0    | 0    | <b>25.35</b>   |
|                                          |           |            | IL-10        | 3.14 | 0     | 0    | 0            | 0    | 0.13 | 0              |
|                                          |           | Post vac 3 | IL-5         | 0    | 0     | 0    | 0            | 0    | 0    | <b>34.49</b>   |
|                                          |           |            | IFN $\gamma$ | 0    | 0     | 0    | 0            | 0    | 0    | <b>212.24</b>  |
|                                          |           |            | TNF $\alpha$ | 0    | 0     | 0    | 0            | 0    | 0    | 17.06          |
|                                          |           | Follow-up  | IL-10        | 0    | 7.69  | 0    | 0            | 0    | 0    | 0              |
|                                          |           |            | IL-5         | 0    | 0     | 0    | 0            | 0    | 0    | <b>66.13</b>   |
|                                          |           |            | IFN $\gamma$ | 0    | 0     | 0    | 0            | 0    | 0    | 29.55          |
|                                          |           |            | TNF $\alpha$ | 0    | 0     | 0    | 0            | 0    | 0    | 10.57          |
|                                          |           |            | IL-10        | 0    | 0.16  | 0    | 0            | 0    | 1.72 | 0              |
| IL-5                                     | 0         | 0          | 0            | 0    | 0     | 0    | <b>51.90</b> |      |      |                |

| Dose<br>( $\mu\text{g}/\text{peptide}$ ) | Patient #    | Time point   | Cytokine     | E6.1  | E6.2         | E6.3 | E6.4 | E7.1           | E7.2           | MRM            |
|------------------------------------------|--------------|--------------|--------------|-------|--------------|------|------|----------------|----------------|----------------|
| 5                                        | 10           | Baseline     | IFN $\gamma$ | 0     | 0            | 0    | 0    | 0              | 0              | <b>887.20</b>  |
|                                          |              |              | TNF $\alpha$ | 0     | 0            | 0    | 0    | 0              | 0              | <b>234.20</b>  |
|                                          |              |              | IL-10        | 0     | 2.44         | 0    | 0    | 0              | 0.13           | 0              |
|                                          |              |              | IL-5         | 0     | 0            | 0.26 | 0    | 0              | 0              | <b>146.46</b>  |
|                                          |              | Post vac 2   | IFN $\gamma$ | 0     | 0            | 0    | 0    | 0              | 0              | <b>1977.26</b> |
|                                          |              |              | TNF $\alpha$ | 0     | 0            | 0    | 0    | 0              | 0              | <b>459.28</b>  |
|                                          |              |              | IL-10        | 0     | 0.81         | 0    | 0    | 0              | 1.21           | 0              |
|                                          |              |              | IL-5         | 0     | 0            | 0    | 5.93 | 0              | 0              | <b>261.16</b>  |
|                                          |              | Post vac 3   | IFN $\gamma$ | 0     | 0            | 0    | 0    | 0              | 0              | <b>1493.38</b> |
|                                          |              |              | TNF $\alpha$ | 0     | 0            | 0    | 0    | 0              | 0              | <b>241.52</b>  |
|                                          |              |              | IL-10        | 0     | 1.64         | 0    | 0    | 0              | 0              | 3.58           |
|                                          |              |              | IL-5         | 0     | 0            | 0    | 0    | 0              | 0              | <b>177.53</b>  |
|                                          | Follow-up    | IFN $\gamma$ | 0            | 0     | 0            | 0    | 0    | 0              | <b>1417.49</b> |                |
|                                          |              | TNF $\alpha$ | 0            | 0     | 0            | 0    | 0    | 0              | <b>437.00</b>  |                |
|                                          |              | IL-10        | 0            | 0     | 0            | 0    | 0    | 0              | 0              |                |
|                                          |              | IL-5         | 0            | 0     | 0            | 0    | 0    | 0              | <b>240.94</b>  |                |
|                                          | 11           | Baseline     | IFN $\gamma$ | 0     | 0            | 0    | 0    | 0              | 0              | <b>761.57</b>  |
|                                          |              |              | TNF $\alpha$ | 0     | 0            | 0    | 0    | 0              | 0              | <b>27.31</b>   |
|                                          |              |              | IL-10        | 0     | 3.17         | 0    | 0    | 0              | 4.00           | <b>27.81</b>   |
|                                          |              |              | IL-5         | 0     | 0            | 0    | 0    | 0              | 0              | <b>79.94</b>   |
|                                          |              | Post vac 2   | IFN $\gamma$ | 0     | 0            | 0    | 0    | 0              | 0              | <b>680.25</b>  |
|                                          |              |              | TNF $\alpha$ | 0     | 0            | 0    | 0    | 0              | 0              | 17.06          |
|                                          |              |              | IL-10        | 0     | <b>36.18</b> | 0    | 0    | 0              | 1.44           | 18.57          |
|                                          |              |              | IL-5         | 0     | 0            | 0    | 0    | 0              | 0              | <b>81.11</b>   |
|                                          |              | Post vac 3   | IFN $\gamma$ | 0     | 0.85         | 0    | 0    | 0              | 0              | <b>1067.80</b> |
|                                          |              |              | TNF $\alpha$ | 0     | 0            | 0    | 0    | 0              | 0              | <b>46.69</b>   |
|                                          |              |              | IL-10        | 1.07  | <b>31.97</b> | 0    | 0    | 0              | 2.97           | <b>23.07</b>   |
|                                          |              |              | IL-5         | 7.57  | 11.47        | 0    | 0    | 0              | 0              | <b>95.00</b>   |
|                                          | Follow-up    | IFN $\gamma$ | 0            | 6.58  | 0            | 0    | 0    | 0              | <b>1156.22</b> |                |
|                                          |              | TNF $\alpha$ | 0            | 0     | 0            | 0    | 0    | 0              | <b>57.70</b>   |                |
|                                          |              | IL-10        | 0            | 13.72 | 0            | 0    | 0    | 1.57           | 16.92          |                |
|                                          |              | IL-5         | 0            | 1.18  | 0            | 0    | 0    | 0              | <b>99.53</b>   |                |
|                                          | 12           | Baseline     | IFN $\gamma$ | 0     | 0            | 0    | 0    | 0              | 0              | <b>2238.96</b> |
|                                          |              |              | TNF $\alpha$ | 0     | 0            | 0    | 0    | 0              | 0              | <b>127.61</b>  |
|                                          |              |              | IL-10        | 0     | 3.59         | 1.06 | 0    | 0              | 2.64           | 1.17           |
|                                          |              |              | IL-5         | 0     | 0            | 0    | 0    | 0              | 0              | <b>49.52</b>   |
| Post vac 2                               |              | IFN $\gamma$ | 0            | 0     | 0            | 0    | 0    | 0              | <b>2515.30</b> |                |
|                                          |              | TNF $\alpha$ | 0            | 0     | 0            | 0    | 0    | 0              | <b>270.16</b>  |                |
|                                          |              | IL-10        | 0            | 4.57  | 0            | 0.19 | 0.19 | 3.98           | 3.56           |                |
|                                          |              | IL-5         | 0            | 0     | 0            | 0    | 0    | 0              | <b>43.72</b>   |                |
| Post vac 3                               |              | IFN $\gamma$ | 0            | 0     | 0            | 0    | 0    | 0              | <b>2456.75</b> |                |
|                                          |              | TNF $\alpha$ | 0            | 0     | 0            | 0    | 0    | 0              | <b>144.10</b>  |                |
|                                          |              | IL-10        | 1.21         | 9.27  | 0            | 0    | 0    | 0.61           | 1.21           |                |
|                                          |              | IL-5         | 0            | 0     | 0            | 0    | 0    | 0              | <b>51.42</b>   |                |
| Follow-up                                | IFN $\gamma$ | 0            | 0            | 0     | 0            | 0    | 0    | <b>2734.57</b> |                |                |
|                                          | TNF $\alpha$ | 0            | 0            | 0     | 0            | 0    | 0    | <b>224.77</b>  |                |                |
|                                          | IL-10        | 0            | 1.64         | 0     | 0            | 0    | 1.32 | 6.90           |                |                |
|                                          | IL-5         | 0            | 0            | 0     | 0            | 0    | 0    | <b>70.57</b>   |                |                |

| Dose<br>( $\mu\text{g}/\text{peptide}$ ) | Patient # | Time point | Cytokine     | E6.1 | E6.2         | E6.3 | E6.4         | E7.1          | E7.2 | MRM           |               |
|------------------------------------------|-----------|------------|--------------|------|--------------|------|--------------|---------------|------|---------------|---------------|
| 20                                       | 13        | Baseline   | IFN $\gamma$ | 0    | 0            | 0    | 0            | 0             | 0    | 32.36         |               |
|                                          |           |            | TNF $\alpha$ | 0    | 0            | 0    | 0            | 0             | 0    | <b>25.88</b>  |               |
|                                          |           |            | IL-10        | 0    | 0            | 0    | 0            | 0             | 0.69 | 0             |               |
|                                          |           |            | IL-5         | 0    | 0            | 0    | 0            | 0             | 0    | <b>98.84</b>  |               |
|                                          |           | Post vac 2 | IFN $\gamma$ | 0    | 10.07        | 0    | 0            | 0             | 0    | 0             | 32.36         |
|                                          |           |            | TNF $\alpha$ | 0    | 0            | 0    | 0            | 0             | 0    | 0             | <b>24.01</b>  |
|                                          |           |            | IL-10        | 0    | 12.48        | 0    | 0            | 0             | 0.82 | 1.24          |               |
|                                          |           |            | IL-5         | 0    | 2.37         | 0.59 | 0            | 0             | 0    | <b>72.99</b>  |               |
|                                          |           | Post vac 3 | IFN $\gamma$ | 1.08 | 9.40         | 0    | 0            | 0             | 0    | 0             | <b>217.62</b> |
|                                          |           |            | TNF $\alpha$ | 0    | 0            | 0    | 0            | 0             | 0    | 0             | <b>31.78</b>  |
|                                          |           |            | IL-10        | 0    | <b>59.08</b> | 0.47 | 0.47         | 0             | 4.31 | 1.44          |               |
|                                          |           |            | IL-5         | 4.13 | <b>25.43</b> | 3.39 | 0.77         | 0             | 0.12 | <b>175.10</b> |               |
|                                          |           | Follow-up  | IFN $\gamma$ | 0    | 1.13         | 0    | 0            | 0             | 0    | 0             | 47.56         |
|                                          |           |            | TNF $\alpha$ | 0    | 0            | 0    | 0            | 0             | 0    | 0             | <b>30.31</b>  |
|                                          |           |            | IL-10        | 0.59 | 12.37        | 0    | 0.41         | 0             | 1.79 | 3.89          |               |
| IL-5                                     | 0         |            | 0.03         | 0    | 0.31         | 0    | 0            | <b>52.92</b>  |      |               |               |
| 14                                       | 14        | Baseline   | IFN $\gamma$ | 0    | 0            | 0    | 0            | 0             | 0    | 3.30          |               |
|                                          |           |            | TNF $\alpha$ | 0    | 0            | 0    | 0            | 0             | 0    | 5.34          |               |
|                                          |           |            | IL-10        | 0    | 0            | 0    | 0            | 0             | 0    | 0             |               |
|                                          |           |            | IL-5         | 0    | 0            | 0    | 0            | 0             | 0    | <b>104.83</b> |               |
|                                          |           | Post vac 2 | IFN $\gamma$ | 0    | 1.08         | 0    | 0.10         | 0             | 0    | 0             | 4.83          |
|                                          |           |            | TNF $\alpha$ | 0    | 0            | 0    | 0            | 0             | 0    | 0             | 8.28          |
|                                          |           |            | IL-10        | 0    | 13.97        | 0    | 0            | 0             | 0    | 0             | 0             |
|                                          |           |            | IL-5         | 0    | 9.00         | 0    | 0.45         | 0             | 0    | <b>135.44</b> |               |
|                                          |           | Post vac 3 | IFN $\gamma$ | 0    | 0            | 0    | 0            | 0             | 0    | 0             | 5.36          |
|                                          |           |            | TNF $\alpha$ | 0    | 0            | 0    | 0            | 0             | 0    | 0             | 7.56          |
|                                          |           |            | IL-10        | 0    | 0            | 0    | 0            | 0             | 2.87 | 1.90          |               |
|                                          |           |            | IL-5         | 0    | 0.10         | 0    | 0            | 0             | 0    | <b>70.89</b>  |               |
|                                          |           | Follow-up  | IFN $\gamma$ | 0    | 0            | 0    | 0            | 0             | 0    | 0             | 27.73         |
|                                          |           |            | TNF $\alpha$ | 0    | 0            | 0    | 0            | 0             | 0    | 0             | <b>40.46</b>  |
|                                          |           |            | IL-10        | 0    | 0            | 0    | 0            | 0             | 0    | 0             | 0             |
| IL-5                                     | 0         |            | 0            | 0    | 0            | 0    | 0            | <b>177.09</b> |      |               |               |
| 15                                       | 15        | Baseline   | IFN $\gamma$ | 0    | 0            | 0    | 0            | 0             | 0    | <b>543.58</b> |               |
|                                          |           |            | TNF $\alpha$ | 0    | 0            | 0    | 0            | 0             | 0    | <b>52.08</b>  |               |
|                                          |           |            | IL-10        | 0    | 0            | 0    | 0            | 0             | 0    | 2.62          |               |
|                                          |           |            | IL-5         | 0    | 0            | 0    | 0            | 0             | 0    | <b>64.93</b>  |               |
|                                          |           | Post vac 2 | IFN $\gamma$ | 0    | 3.80         | 0    | 6.61         | 0             | 0    | 0             | <b>266.14</b> |
|                                          |           |            | TNF $\alpha$ | 0    | 0            | 0    | 0            | 0             | 0    | 0             | <b>34.49</b>  |
|                                          |           |            | IL-10        | 0    | 6.17         | 0    | 4.28         | 0             | 0.73 | 1.98          |               |
|                                          |           |            | IL-5         | 0    | <b>20.42</b> | 0.40 | <b>89.61</b> | 0             | 0    | <b>82.87</b>  |               |
|                                          |           | Post vac 3 | IFN $\gamma$ | 0    | 11.98        | 0    | 6.51         | 0             | 0    | 0             | <b>412.63</b> |
|                                          |           |            | TNF $\alpha$ | 0    | 0            | 0    | 0            | 0             | 0    | 0             | <b>68.47</b>  |
|                                          |           |            | IL-10        | 0    | 3.88         | 0    | 0            | 0             | 0.26 | 0.75          |               |
|                                          |           |            | IL-5         | 0    | 13.60        | 0.82 | 10.14        | 0             | 0    | <b>44.41</b>  |               |
|                                          |           | Follow-up  | IFN $\gamma$ | 0    | 0            | 0    | 0            | 0             | 0    | 0             | <b>331.49</b> |
|                                          |           |            | TNF $\alpha$ | 0    | 0            | 0    | 0            | 0             | 0    | 0             | <b>87.42</b>  |
|                                          |           |            | IL-10        | 0    | 0.57         | 0    | 0            | 0             | 2.27 | 4.63          |               |
| IL-5                                     | 0         |            | 0.62         | 0    | 0.52         | 0    | 0            | <b>45.29</b>  |      |               |               |



| Dose<br>( $\mu\text{g}/\text{peptide}$ ) | Patient # | Time point   | Cytokine     | E6.1          | E6.2          | E6.3          | E6.4          | E7.1 | E7.2           | MRM            |
|------------------------------------------|-----------|--------------|--------------|---------------|---------------|---------------|---------------|------|----------------|----------------|
| 20                                       | 16        | Baseline     | IFN $\gamma$ | 0             | 0.47          | 0             | 1.28          | 0.10 | 0              | <b>1464.75</b> |
|                                          |           |              | TNF $\alpha$ | 0             | 0             | 0             | 0.16          | 0    | 0              | <b>102.52</b>  |
|                                          |           |              | IL-10        | 0             | 3.39          | 0             | 0             | 0    | 0.27           | 0              |
|                                          |           |              | IL-5         | 0             | 0.28          | 0             | 0             | 0    | 0              | <b>95.97</b>   |
|                                          |           | Post vac 2   | IFN $\gamma$ | 0             | 0             | 0             | 9.27          | 0    | 0              | <b>1493.12</b> |
|                                          |           |              | TNF $\alpha$ | 0             | 0             | 0             | 16.34         | 0    | 0              | <b>178.10</b>  |
|                                          |           |              | IL-10        | 0             | 1.89          | 0             | 6.13          | 0    | 0.10           | 0              |
|                                          |           |              | IL-5         | 0             | 0.26          | 0             | 0.31          | 0    | 0              | <b>135.44</b>  |
|                                          |           | Post vac 3   | IFN $\gamma$ | 0             | 0             | 0             | 2.39          | 0    | 0              | <b>1153.01</b> |
|                                          |           |              | TNF $\alpha$ | 0             | 0             | 0             | 2.49          | 0    | 0              | <b>223.71</b>  |
|                                          |           |              | IL-10        | 0             | 1.24          | 0             | 0             | 0    | 0              | 0              |
|                                          |           |              | IL-5         | 0             | 0             | 0             | 0             | 0    | 0              | <b>119.13</b>  |
|                                          | Follow-up | IFN $\gamma$ | 0            | 0             | 0             | 3.58          | 0             | 0    | <b>1675.56</b> |                |
|                                          |           | TNF $\alpha$ | 0            | 0             | 0             | 7.70          | 0             | 0    | <b>275.42</b>  |                |
|                                          |           | IL-10        | 0            | 1.27          | 0             | 0             | 0             | 0    | 0              |                |
|                                          |           | IL-5         | 0            | 0             | 0             | 0             | 0             | 0    | <b>173.59</b>  |                |
| 17                                       | 17        | Baseline     | IFN $\gamma$ | 0             | 0             | 0             | 0             | 0    | 0              | <b>217.62</b>  |
|                                          |           |              | TNF $\alpha$ | 0             | 0             | 0             | 0             | 0    | 0              | <b>157.28</b>  |
|                                          |           |              | IL-10        | 0             | 0             | 0             | 0             | 0    | 0              | 0              |
|                                          |           |              | IL-5         | 0             | 0             | 0             | 0             | 0    | 0              | <b>386.73</b>  |
|                                          |           | Post vac 2   | IFN $\gamma$ | 0             | 38.48         | 3.88          | 15.45         | 0    | 0              | <b>319.09</b>  |
|                                          |           |              | TNF $\alpha$ | 0             | 11.98         | 6.08          | 7.14          | 0    | 0              | <b>115.37</b>  |
|                                          |           |              | IL-10        | 0             | <b>26.65</b>  | 3.00          | 6.12          | 0    | 2.70           | 0              |
|                                          |           |              | IL-5         | 1.46          | <b>407.26</b> | <b>66.86</b>  | <b>390.75</b> | 0    | 0              | <b>171.87</b>  |
|                                          |           | Post vac 3   | IFN $\gamma$ | 0.25          | 39.74         | 2.64          | 5.82          | 0    | 0              | <b>159.81</b>  |
|                                          |           |              | TNF $\alpha$ | 0             | 9.21          | 3.21          | 3.03          | 0    | 0              | <b>66.38</b>   |
|                                          |           |              | IL-10        | 0             | <b>44.08</b>  | 17.07         | 0             | 0    | 1.65           | 0              |
|                                          |           |              | IL-5         | 0             | <b>695.92</b> | <b>197.68</b> | <b>214.21</b> | 0    | 0              | <b>338.29</b>  |
|                                          | Follow-up | IFN $\gamma$ | 0            | <b>55.60</b>  | 8.52          | 8.64          | 0             | 0    | <b>378.77</b>  |                |
|                                          |           | TNF $\alpha$ | 0            | 19.26         | 9.21          | 9.05          | 0             | 0    | <b>134.81</b>  |                |
|                                          |           | IL-10        | 0            | 15.90         | 4.27          | 1.83          | 0             | 0.87 | 0              |                |
|                                          |           | IL-5         | 0            | <b>262.14</b> | <b>109.03</b> | <b>254.29</b> | 0             | 0    | <b>151.03</b>  |                |
| 18                                       | 18        | Baseline     | IFN $\gamma$ |               |               |               |               |      |                |                |
|                                          |           |              | TNF $\alpha$ |               |               |               |               |      |                |                |
|                                          |           |              | IL-10        |               |               |               |               |      |                |                |
|                                          |           |              | IL-5         |               |               |               |               |      |                |                |
|                                          |           | Post vac 2   | IFN $\gamma$ | 0             | 0             | 0             | 0             | 0    | 0              | 16.83          |
|                                          |           |              | TNF $\alpha$ | 0             | 0             | 0             | 0             | 0    | 0              | 9.37           |
|                                          |           |              | IL-10        | 0.71          | 1.36          | 0.61          | 3.66          | 0.82 | 3.01           | 6.41           |
|                                          |           |              | IL-5         | 0             | 0             | 0             | 0             | 0    | 0              | 8.06           |
|                                          |           | Post vac 3   | IFN $\gamma$ |               |               |               |               |      |                |                |
|                                          |           |              | TNF $\alpha$ |               |               |               |               |      |                |                |
|                                          |           |              | IL-10        |               |               |               |               |      |                |                |
|                                          |           |              | IL-5         |               |               |               |               |      |                |                |
|                                          | Follow-up | IFN $\gamma$ | 0            | 0             | 0             | 0             | 0             | 0    | 1.03           |                |
|                                          |           | TNF $\alpha$ | 0            | 0             | 0             | 0             | 0             | 0    | 7.27           |                |
|                                          |           | IL-10        | 0            | 0             | 0             | 0             | 0             | 0    | 2.50           |                |
|                                          |           | IL-5         | 0            | 0             | 0             | 0             | 0             | 0    | <b>35.48</b>   |                |

| Dose<br>( $\mu\text{g}/\text{peptide}$ ) | Patient # | Time point | Cytokine       | E6.1          | E6.2           | E6.3          | E6.4          | E7.1          | E7.2 | MRM            |
|------------------------------------------|-----------|------------|----------------|---------------|----------------|---------------|---------------|---------------|------|----------------|
| 50                                       | 19        | Baseline   | IFN $\gamma$   |               |                |               |               |               |      |                |
|                                          |           |            | TNF $\alpha$   |               |                |               |               |               |      |                |
|                                          |           |            | IL-10          |               |                |               |               |               |      |                |
|                                          |           |            | IL-5           |               |                |               |               |               |      |                |
|                                          |           | Post vac 2 | IFN $\gamma$   | 0             | <b>201.81</b>  | 15.79         | <b>152.57</b> | 0             | 0    | <b>441.36</b>  |
|                                          |           |            | TNF $\alpha$   | 0             | 11.67          | 2.78          | <b>21.35</b>  | 0             | 0    | <b>89.26</b>   |
|                                          |           |            | IL-10          | 0             | <b>150.24</b>  | 19.96         | <b>54.53</b>  | 0             | 0    | 4.09           |
|                                          |           |            | IL-5           | 0             | <b>548.43</b>  | <b>71.76</b>  | <b>279.75</b> | 0             | 0    | <b>146.88</b>  |
|                                          |           | Post vac 3 | IFN $\gamma$   | 4.10          | <b>416.99</b>  | 32.92         | <b>211.90</b> | 0             | 0.88 | <b>144.70</b>  |
|                                          |           |            | TNF $\alpha$   | 0             | 18.65          | 2.41          | <b>20.79</b>  | 0             | 0.52 | <b>59.23</b>   |
|                                          |           |            | IL-10          | 0.37          | <b>109.77</b>  | <b>24.55</b>  | <b>47.21</b>  | 0             | 1.01 | 3.38           |
|                                          |           |            | IL-5           | 17.84         | <b>1509.01</b> | <b>171.02</b> | <b>423.24</b> | 0             | 0    | <b>152.20</b>  |
|                                          |           | Follow-up  | IFN $\gamma$   | 0             | <b>717.32</b>  | <b>244.87</b> | <b>226.72</b> | 0             | 0    | <b>329.22</b>  |
|                                          |           |            | TNF $\alpha$   | 0             | <b>32.88</b>   | 9.80          | <b>32.13</b>  | 0             | 0    | <b>46.49</b>   |
|                                          |           |            | IL-10          | 0             | <b>143.41</b>  | <b>27.57</b>  | <b>60.18</b>  | 0             | 0    | 17.71          |
| IL-5                                     | 0         |            | <b>2822.94</b> | <b>299.24</b> | <b>1047.22</b> | 0             | 0             | <b>172.57</b> |      |                |
| 20                                       | 20        | Baseline   | IFN $\gamma$   | 0             | 0              | 0             | 0             | 0             | 0    | <b>351.81</b>  |
|                                          |           |            | TNF $\alpha$   | 0             | 0              | 0             | 0             | 0             | 0    | <b>47.00</b>   |
|                                          |           |            | IL-10          | 0             | 1.23           | 0             | 0             | 0             | 1.44 | 0.34           |
|                                          |           |            | IL-5           | 0             | 0              | 0             | 0             | 0             | 0    | <b>45.60</b>   |
|                                          |           | Post vac 2 | IFN $\gamma$   | 0             | 0              | 0             | 0             | 0             | 0    | <b>167.73</b>  |
|                                          |           |            | TNF $\alpha$   | 0             | 0              | 0             | 0             | 0             | 0    | <b>68.31</b>   |
|                                          |           |            | IL-10          | 0             | 6.98           | 0             | 0             | 0             | 2.91 | 0              |
|                                          |           |            | IL-5           | 0             | 0              | 0             | 0             | 0             | 0    | <b>55.76</b>   |
|                                          |           | Post vac 3 | IFN $\gamma$   | 0             | 0              | 0             | 0             | 0             | 0    | <b>274.72</b>  |
|                                          |           |            | TNF $\alpha$   | 0             | 0              | 0             | 0             | 0             | 0    | <b>61.08</b>   |
|                                          |           |            | IL-10          | 0.46          | 8.93           | 0.74          | 0.06          | 0.13          | 2.25 | 0              |
|                                          |           |            | IL-5           | 0             | 4.38           | 0             | 0             | 0             | 0    | <b>69.97</b>   |
|                                          |           | Follow-up  | IFN $\gamma$   | 0             | 0              | 0             | 0             | 0             | 0    | <b>1861.41</b> |
|                                          |           |            | TNF $\alpha$   | 0             | 0              | 0             | 0             | 0             | 0    | <b>415.72</b>  |
|                                          |           |            | IL-10          | 0.18          | 5.25           | 0             | 0             | 0             | 1.91 | 12.92          |
| IL-5                                     | 0         |            | 2.62           | 0             | 0              | 0             | 0             | <b>63.78</b>  |      |                |
| 21                                       | 21        | Baseline   | IFN $\gamma$   | 0             | 0              | 0             | 0             | 0             | 0    | 0              |
|                                          |           |            | TNF $\alpha$   | 0             | 0              | 0             | 0             | 0             | 0    | 0              |
|                                          |           |            | IL-10          | 0             | 0              | 0             | 0             | 0             | 3.77 | 2.77           |
|                                          |           |            | IL-5           | 0             | 0              | 0             | 0             | 0             | 0    | 0              |
|                                          |           | Post vac 2 | IFN $\gamma$   | 0             | 2.73           | 0             | 2.95          | 0             | 0    | 0              |
|                                          |           |            | TNF $\alpha$   | 0             | 0              | 0             | 0             | 0             | 0    | 1.57           |
|                                          |           |            | IL-10          | 0             | 14.70          | 0             | 0             | 0             | 0    | 0.59           |
|                                          |           |            | IL-5           | 0             | <b>80.11</b>   | 0             | <b>111.91</b> | 0             | 0    | 0              |
|                                          |           | Post vac 3 | IFN $\gamma$   | 0             | 12.94          | 0             | 11.71         | 0             | 0    | 0              |
|                                          |           |            | TNF $\alpha$   | 0             | 0              | 0             | 0             | 0             | 0    | 0              |
|                                          |           |            | IL-10          | 1.37          | 16.63          | 0.23          | 5.36          | 0             | 2.10 | 0.28           |
|                                          |           |            | IL-5           | 0             | <b>81.48</b>   | 0             | <b>105.33</b> | 0             | 0    | 3.06           |
|                                          |           | Follow-up  | IFN $\gamma$   | 0             | 5.76           | 0             | 4.28          | 0             | 0    | 0              |
|                                          |           |            | TNF $\alpha$   | 0             | 0              | 0             | 0             | 0             | 0    | 1.20           |
|                                          |           |            | IL-10          | 2.90          | 11.47          | 1.82          | 4.74          | 2.31          | 5.87 | 4.17           |
| IL-5                                     | 0         |            | <b>82.88</b>   | 0             | <b>114.86</b>  | 0             | 0             | 0             |      |                |

| Dose<br>( $\mu\text{g}/\text{peptide}$ ) | Patient # | Time point | Cytokine     | E6.1  | E6.2          | E6.3         | E6.4          | E7.1          | E7.2 | MRM           |
|------------------------------------------|-----------|------------|--------------|-------|---------------|--------------|---------------|---------------|------|---------------|
| 50                                       | 22        | Baseline   | IFN $\gamma$ |       |               |              |               |               |      |               |
|                                          |           |            | TNF $\alpha$ |       |               |              |               |               |      |               |
|                                          |           |            | IL-10        |       |               |              |               |               |      |               |
|                                          |           |            | IL-5         |       |               |              |               |               |      |               |
|                                          |           | Post vac 2 | IFN $\gamma$ | 0     | 7.36          | 0            | 0.94          | 0             | 0    | 27.60         |
|                                          |           |            | TNF $\alpha$ | 0     | 0             | 0            | 0             | 0             | 0    | 1.69          |
|                                          |           |            | IL-10        | 0     | 19.26         | 0            | 1.38          | 0             | 0    | 5.09          |
|                                          |           |            | IL-5         | 0     | <b>24.11</b>  | 1.69         | 11.22         | 0             | 0    | <b>24.11</b>  |
|                                          |           | Post vac 3 | IFN $\gamma$ | 0     | 1.69          | 0            | 0             | 0             | 0    | 1.82          |
|                                          |           |            | TNF $\alpha$ | 0     | 0             | 0            | 0             | 0             | 0    | 0             |
|                                          |           |            | IL-10        | 0     | 12.72         | 0.36         | 0.53          | 0             | 0.58 | 2.91          |
|                                          |           |            | IL-5         | 0     | <b>21.71</b>  | 0            | 3.40          | 0             | 0    | 3.12          |
|                                          |           | Follow-up  | IFN $\gamma$ | 0     | 0             | 0            | 0             | 0             | 0    | 0             |
|                                          |           |            | TNF $\alpha$ | 0     | 0             | 0            | 0             | 0             | 0    | 0             |
|                                          |           |            | IL-10        | 0     | 2.76          | 0            | 0             | 0             | 0.34 | 2.34          |
| IL-5                                     | 0         |            | 1.18         | 0     | 0             | 0            | 0             | 0             |      |               |
| 23                                       | 23        | Baseline   | IFN $\gamma$ | 0     | 0             | 0            | 0             | 0             | 0    | 7.48          |
|                                          |           |            | TNF $\alpha$ | 0     | 0             | 0            | 0             | 0             | 0    | 8.59          |
|                                          |           |            | IL-10        | 0     | 0             | 0            | 0             | 0             | 0    | 0             |
|                                          |           |            | IL-5         | 0     | 0             | 8.65         | 0             | 0             | 0.41 | <b>73.61</b>  |
|                                          |           | Post vac 2 | IFN $\gamma$ | 0     | <b>156.59</b> | 13.49        | <b>131.02</b> | 0             | 0    | 12.05         |
|                                          |           |            | TNF $\alpha$ | 0     | 15.72         | 0            | <b>31.01</b>  | 0             | 0    | 14.59         |
|                                          |           |            | IL-10        | 0     | <b>349.64</b> | <b>28.37</b> | <b>38.09</b>  | 0             | 0.94 | 4.73          |
|                                          |           |            | IL-5         | 0     | <b>45.21</b>  | 19.00        | <b>117.90</b> | 0             | 0    | <b>79.43</b>  |
|                                          |           | Post vac 3 | IFN $\gamma$ | 1.82  | <b>169.39</b> | 5.86         | 26.31         | 0             | 0    | 4.47          |
|                                          |           |            | TNF $\alpha$ | 0     | 6.08          | 0            | 1.94          | 0             | 0    | 7.29          |
|                                          |           |            | IL-10        | 0     | <b>135.6</b>  | 0            | 3.38          | 0             | 0    | 0             |
|                                          |           |            | IL-5         | 1.08  | <b>45.60</b>  | 17.05        | <b>28.89</b>  | 0             | 0    | <b>62.71</b>  |
|                                          |           | Follow-up  | IFN $\gamma$ | 0     | <b>59.94</b>  | 3.76         | 17.19         | 0             | 0    | 3.43          |
|                                          |           |            | TNF $\alpha$ | 0     | 3.02          | 0            | 0             | 0             | 0    | 5.65          |
|                                          |           |            | IL-10        | 0     | <b>147.00</b> | 11.04        | <b>20.38</b>  | 0             | 2.17 | 7.06          |
| IL-5                                     | 0         |            | <b>36.03</b> | 10.56 | <b>38.22</b>  | 0            | 0             | <b>44.84</b>  |      |               |
| 24                                       | 24        | Baseline   | IFN $\gamma$ | 0     | 0             | 0            | 5.76          | 0             | 0    | <b>86.51</b>  |
|                                          |           |            | TNF $\alpha$ | 0     | 0             | 0            | 0             | 0             | 0    | <b>32.13</b>  |
|                                          |           |            | IL-10        | 0     | 0             | 0            | 0.33          | 0             | 1.58 | 2.16          |
|                                          |           |            | IL-5         | 0     | 0             | 0            | 1.99          | 0             | 0    | <b>87.97</b>  |
|                                          |           | Post vac 2 | IFN $\gamma$ | 0     | 13.68         | 0.44         | 18.82         | 0             | 0    | <b>211.90</b> |
|                                          |           |            | TNF $\alpha$ | 0     | 0             | 0            | 0.67          | 0             | 0    | <b>77.02</b>  |
|                                          |           |            | IL-10        | 0     | <b>37.46</b>  | 0.30         | 16.96         | 0             | 0.51 | 4.22          |
|                                          |           |            | IL-5         | 0     | 2.25          | 0            | 4.32          | 0             | 0    | <b>114.86</b> |
|                                          |           | Post vac 3 | IFN $\gamma$ | 0     | <b>141.86</b> | 8.80         | <b>244.87</b> | 0             | 0    | <b>152.02</b> |
|                                          |           |            | TNF $\alpha$ | 0     | 2.17          | 0            | 8.76          | 0             | 0    | <b>43.09</b>  |
|                                          |           |            | IL-10        | 0     | <b>70.38</b>  | 2.88         | <b>66.33</b>  | 0             | 1.22 | 3.20          |
|                                          |           |            | IL-5         | 0     | <b>20.59</b>  | 1.74         | <b>28.89</b>  | 0             | 0    | <b>118.93</b> |
|                                          |           | Follow-up  | IFN $\gamma$ | 0     | 11.71         | 0            | 20.84         | 0             | 0    | <b>140.46</b> |
|                                          |           |            | TNF $\alpha$ | 0     | 0             | 0            | 3.27          | 0             | 0    | <b>24.60</b>  |
|                                          |           |            | IL-10        | 0     | 9.34          | 0            | 9.15          | 0             | 0.75 | 0             |
| IL-5                                     | 0         |            | 4.51         | 0     | <b>47.95</b>  | 0            | 0             | <b>100.03</b> |      |               |

| Dose<br>( $\mu\text{g}/\text{peptide}$ ) | Patient # | Time point | Cytokine      | E6.1          | E6.2          | E6.3          | E6.4          | E7.1         | E7.2 | MRM            |
|------------------------------------------|-----------|------------|---------------|---------------|---------------|---------------|---------------|--------------|------|----------------|
| 50                                       | 25        | Baseline   | IFN $\gamma$  | 0             | 0             | 0             | 0             | 0            | 0    | <b>1760.99</b> |
|                                          |           |            | TNF $\alpha$  | 0             | 0             | 0             | 0             | 0            | 0    | <b>57.42</b>   |
|                                          |           |            | IL-10         | 0             | 0.07          | 0             | 0             | 0            | 0.37 | 12.54          |
|                                          |           | Post vac 2 | IL-5          | 0             | 0             | 0             | 0             | 0            | 0    | <b>21.33</b>   |
|                                          |           |            | IFN $\gamma$  | 0             | <b>129.72</b> | 12.05         | <b>458.11</b> | 2.16         | 0    | <b>503.16</b>  |
|                                          |           |            | TNF $\alpha$  | 0             | 9.10          | 0             | 4.03          | 0            | 0    | <b>39.01</b>   |
|                                          |           | Post vac 3 | IL-10         | 0             | <b>53.02</b>  | 4.09          | 11.11         | 0.19         | 0.82 | 7.40           |
|                                          |           |            | IL-5          | 0             | <b>603.64</b> | <b>64.32</b>  | <b>277.09</b> | 2.73         | 0    | <b>56.70</b>   |
|                                          |           |            | IFN $\gamma$  | 0             | <b>103.98</b> | 2.29          | 46.71         | 0            | 0    | <b>896.38</b>  |
|                                          |           | Follow-up  | TNF $\alpha$  | 0             | 7.77          | 0             | 4.03          | 0            | 0    | <b>20.51</b>   |
|                                          |           |            | IL-10         | 0             | <b>31.89</b>  | 6.47          | 5.53          | 0            | 0.82 | 3.23           |
|                                          |           |            | IL-5          | 0             | <b>577.93</b> | <b>126.02</b> | <b>319.88</b> | 0            | 0    | <b>59.22</b>   |
|                                          |           |            | IFN $\gamma$  | 0             | <b>228.92</b> | 11.21         | <b>116.20</b> | 8.97         | 0    | <b>2198.47</b> |
|                                          |           |            | TNF $\alpha$  | 0             | 6.83          | 0             | 0.52          | 0            | 0    | <b>21.92</b>   |
|                                          |           | Follow-up  | IL-10         | 0.19          | <b>48.93</b>  | 4.79          | 6.86          | 0.29         | 0.79 | 7.10           |
| IL-5                                     | 0         |            | <b>596.07</b> | <b>211.37</b> | <b>223.95</b> | 11.60         | 0             | <b>60.07</b> |      |                |

Cytokine produced by T cells (in pg/ml) in the supernatant of the proliferation assay (Lymphocyte stimulation tests, LST) obtained at day 6 as measured by Cytometric Bead Array (CBA). The threshold of cytokines was 20 pg/ml, except for IFN $\gamma$  which was set at 50 pg/ml. The cytokine production in the negative control (cells medium only) was subtracted from those upon peptide pool or MRM stimulation. The grey shaded peptide pools indicate the peptide pools covering the vaccine peptides. A value in bold indicates a positive response.

Supplemental Table 3: Specific spot counts in ELISPOT assay

| Dose<br>( $\mu\text{g/peptide}$ ) | Patient #  | Time point | Vaccine<br>Peptide A | Vaccine<br>Peptide B | MRM |
|-----------------------------------|------------|------------|----------------------|----------------------|-----|
| 1                                 | 1          | Baseline   | 5                    | 7                    | 207 |
|                                   |            | Post vac 2 | 0                    | 0                    | 147 |
|                                   |            | Post vac 3 | 14                   | 0                    | 158 |
|                                   |            | Follow-up  | 5                    | 0                    | 154 |
|                                   | 2          | Baseline   | 1                    | 9                    | 314 |
|                                   |            | Post vac 2 | 0                    | 22                   | 317 |
|                                   |            | Post vac 3 | 7                    | 17                   | 313 |
|                                   |            | Follow-up  | 2                    | 23                   | 309 |
|                                   | 3          | Baseline   | 0                    | 0                    | 158 |
|                                   |            | Post vac 2 | 64                   | 11                   | 219 |
|                                   |            | Post vac 3 | 0                    | 0                    | 73  |
|                                   |            | Follow-up  | 74                   | 11                   | 142 |
| 4                                 | Baseline   | 9          | 3                    | 304                  |     |
|                                   | Post vac 2 |            |                      |                      |     |
|                                   | Post vac 3 | 2          | 7                    | 620                  |     |
|                                   | Follow-up  | 2          | 6                    | 436                  |     |
| 5                                 | Baseline   | 0          | 0                    | 138                  |     |
|                                   | Post vac 2 | 5          | 0                    |                      |     |
|                                   | Post vac 3 | 0          | 0                    | 143                  |     |
|                                   | Follow-up  | 0          | 0                    | 591                  |     |
| 6                                 | Baseline   | 0          | 0                    | 307                  |     |
|                                   | Post vac 2 | 0          | 5                    | 313                  |     |
|                                   | Post vac 3 | 0          | 0                    | 350                  |     |
|                                   | Follow-up  | 2          | 0                    | 314                  |     |
| 5                                 | 7          | Baseline   | 3                    | 3                    | 316 |
|                                   |            | Post vac 2 | 7                    | 8                    | 315 |
|                                   |            | Post vac 3 | 1                    | 0                    | 314 |
|                                   |            | Follow-up  | 3                    | 21                   | 316 |
|                                   | 8          | Baseline   | 0                    | 115                  | 348 |
|                                   |            | Post vac 2 | 40                   | 0                    | 370 |
|                                   |            | Post vac 3 | 49                   | 88                   | 294 |
|                                   |            | Follow-up  | 7                    | 35                   | 301 |
|                                   | 9          | Baseline   | 0                    | 0                    | 229 |
|                                   |            | Post vac 2 | 14                   | 13                   | 253 |
|                                   |            | Post vac 3 | 7                    | 4                    | 216 |
|                                   |            | Follow-up  | 32                   | 3                    | 229 |
| 10                                | Baseline   | 0          | 0                    | 306                  |     |
|                                   | Post vac 2 | 7          | 41                   | 315                  |     |
|                                   | Post vac 3 | 17         | 28                   | 316                  |     |
|                                   | Follow-up  | 0          | 43                   | 310                  |     |
| 11                                | Baseline   | 0          | 0                    | 264                  |     |
|                                   | Post vac 2 | 68         | 54                   | 223                  |     |
|                                   | Post vac 3 | 87         | 0                    | 297                  |     |
|                                   | Follow-up  | 12         | 52                   | 282                  |     |
| 12                                | Baseline   | 0          | 0                    | 210                  |     |
|                                   | Post vac 2 | 0          | 0                    | 135                  |     |
|                                   | Post vac 3 | 3          | 0                    | 151                  |     |
|                                   | Follow-up  | 1          | 0                    | 190                  |     |

| <b>Dose<br/>(<math>\mu\text{g}/\text{peptide}</math>)</b> | <b>Patient #</b> | <b>Time point</b> | <b>Vaccine<br/>Peptide A</b> | <b>Vaccine<br/>Peptide B</b> | <b>MRM</b> |
|-----------------------------------------------------------|------------------|-------------------|------------------------------|------------------------------|------------|
| 20                                                        | 13               | Baseline          | 0                            | 79                           | 189        |
|                                                           |                  | Post vac 2        | 114                          | 23                           | 189        |
|                                                           |                  | Post vac 3        | 131                          | 24                           | 194        |
|                                                           |                  | Follow-up         | 58                           | 0                            | 145        |
|                                                           | 14               | Baseline          | <1                           | 2                            | 219        |
|                                                           |                  | Post vac 2        | 20                           | 3                            | 185        |
|                                                           |                  | Post vac 3        | 13                           | 0                            | 164        |
|                                                           |                  | Follow-up         | 32                           | 8                            | 196        |
|                                                           | 15               | Baseline          | 0                            | 10                           | 291        |
|                                                           |                  | Post vac 2        | 155                          | 158                          | 245        |
|                                                           |                  | Post vac 3        | 59                           | 85                           | 226        |
|                                                           | 16               | Baseline          | 0                            | 3                            | 90         |
|                                                           |                  | Post vac 2        | 1                            | 106                          | 116        |
|                                                           |                  | Post vac 3        | 0                            | 39                           | 355        |
|                                                           |                  | Follow-up         | 0                            | 0                            | 356        |
|                                                           | 17               | Baseline          | 0                            | 0                            | 183        |
| Post vac 2                                                |                  | 193               | 63                           | 174                          |            |
| Post vac 3                                                |                  | 121               | 98                           | 194                          |            |
| Follow-up                                                 |                  | 187               | 58                           | 237                          |            |
| 18                                                        | Baseline         | 0                 | 0                            | 237                          |            |
|                                                           | Post vac 2       | 194               | 64                           | 242                          |            |
|                                                           | Post vac 3       | 197               | 28                           | 176                          |            |
|                                                           | Follow-up        | 0                 | 0                            | 349                          |            |
| 50                                                        | 19               | Baseline          | 20                           | 8                            | 147        |
|                                                           |                  | Post vac 2        | 230                          | 134                          | 116        |
|                                                           |                  | Post vac 3        | 208                          | 187                          | 139        |
|                                                           |                  | Follow-up         | 225                          | 137                          | 71         |
|                                                           | 20               | Baseline          | 0                            | 2                            | 319        |
|                                                           |                  | Post vac 2        | 24                           | 0                            | 315        |
|                                                           |                  | Post vac 3        | 38                           | 3                            | 371        |
|                                                           |                  | Follow-up         | 16                           | 0                            | 313        |
|                                                           | 21               | Baseline          | 4                            | 0                            | 218        |
|                                                           |                  | Post vac 2        | 402                          | 169                          | 138        |
|                                                           |                  | Post vac 3        | 306                          | 179                          | 256        |
|                                                           |                  | Follow-up         | 336                          | 277                          | 35         |
|                                                           | 22               | Baseline          | 0                            | 0                            | 185        |
|                                                           |                  | Post vac 2        | 264                          | 36                           | 152        |
|                                                           |                  | Post vac 3        | 100                          | 0                            |            |
|                                                           |                  | Follow-up         | 120                          | 0                            | 208        |
|                                                           | 23               | Baseline          | 1                            | 0                            | 177        |
|                                                           |                  | Post vac 2        | 391                          | 342                          | 245        |
|                                                           |                  | Post vac 3        | 303                          | 265                          | 208        |
|                                                           |                  | Follow-up         | 242                          | 181                          | 149        |
| 24                                                        | Baseline         | 0                 | 0                            | 159                          |            |
|                                                           | Post vac 2       | 187               | 196                          | 201                          |            |
|                                                           | Post vac 3       | 190               | 157                          | 169                          |            |
|                                                           | Follow-up        | 106               | 137                          | 183                          |            |
| 25                                                        | Baseline         | 0                 | 141                          | 152                          |            |
|                                                           | Post vac 2       | 44                | 0                            | 0                            |            |
|                                                           | Post vac 3       | 62                | 58                           | 32                           |            |
|                                                           | Follow-up        | 159               | 129                          | 136                          |            |

The T cell responses to vaccine peptides E6<sub>71-95</sub> (peptide A) and E6<sub>127-158</sub> (peptide B) was measured by the validated 4-days IFN $\gamma$  ELISPOT assay. Given are specific spot counts per 10<sup>5</sup> cells. MRM was taken along as positive control. The grey shaded peptides indicate the vaccine peptides. A positive response was defined as at least 10 specific spots per 10<sup>5</sup> cells and at least twice that of the cells in medium only and indicated in bold.
