# Supplementary material for: Intradermal vaccination of HPV-16 E6 synthetic peptides conjugated to an optimized Toll-like receptor 2 ligand shows safety and potent T cell immunogenicity in patients with HPV-16 positive (pre-)malignant lesions
Source: PubMed Central journal article supplement — J Immunother Cancer. 2022 Oct 19;10(10):e005016. doi: 10.1136/jitc-2022-005016 (PMC9582304; doi:10.1136/jitc-2022-005016), 2022-10-19
Supplement: jitc-2022-005016supp002.pdf [file jitc-2022-005016supp002.pdf]

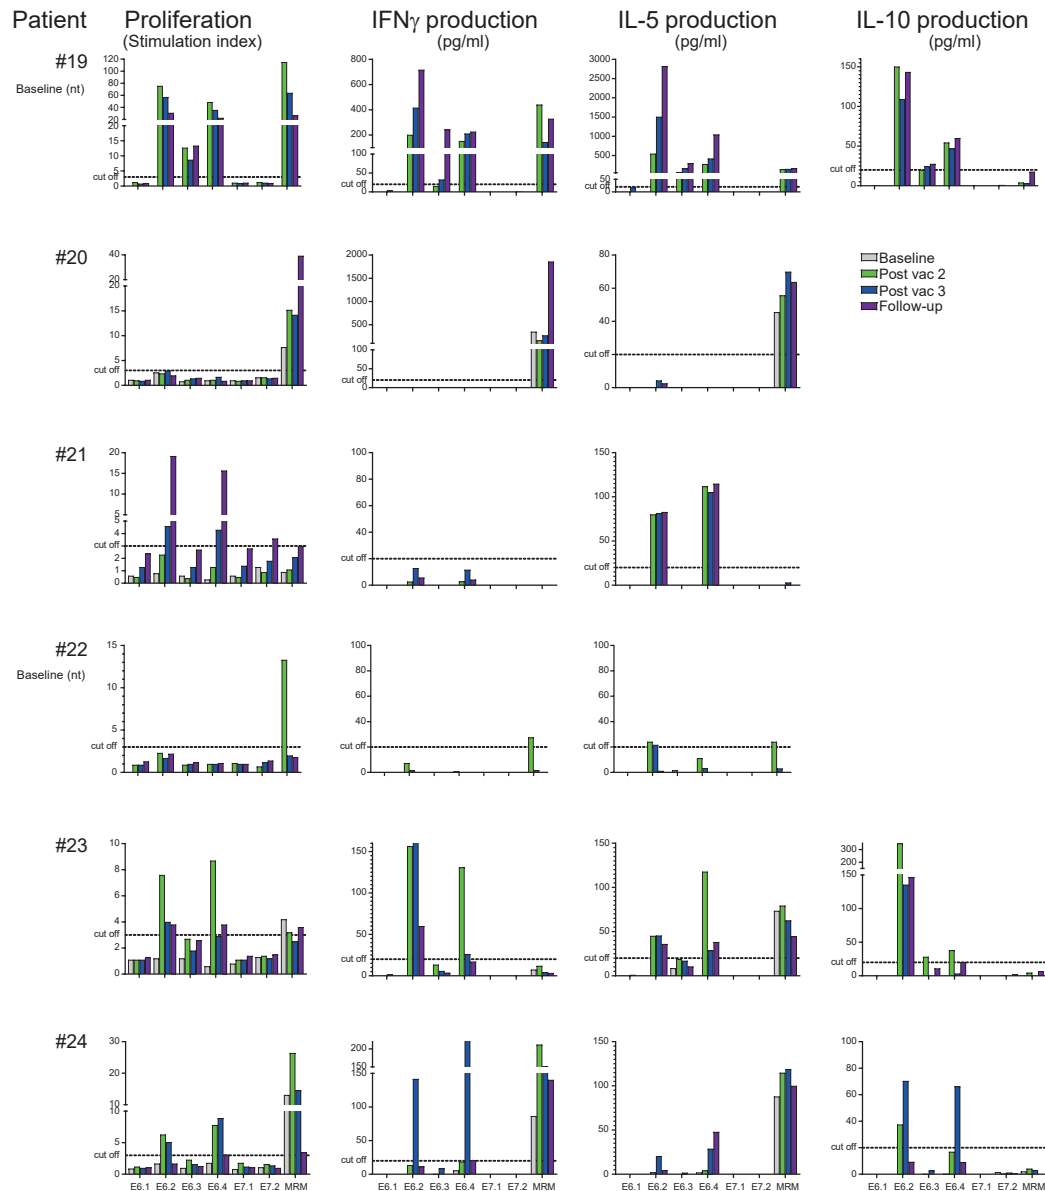

**Supplemental Figure 1:** Proliferation and cytokine production of patients from highest dose cohort. The lymphocyte stimulation test (LST) is a 7-day proliferation test and depicted as stimulation index in the left graphs for the patients in the highest dose cohort, except for patient #25 (see Figure 2). The cytokines measured by cytometric bead array in the culture medium harvested on day 6 is shown for IFN $\gamma$  and IL-5. In addition, IL-10 is given only when produced above the threshold level.
