# Supplementary material for: Intradermal vaccination of HPV-16 E6 synthetic peptides conjugated to an optimized Toll-like receptor 2 ligand shows safety and potent T cell immunogenicity in patients with HPV-16 positive (pre-)malignant lesions
Source: PubMed Central journal article supplement — J Immunother Cancer. 2022 Oct 19;10(10):e005016. doi: 10.1136/jitc-2022-005016 (PMC9582304; doi:10.1136/jitc-2022-005016), 2022-10-19
Supplement: jitc-2022-005016supp003.pdf [file jitc-2022-005016supp003.pdf]

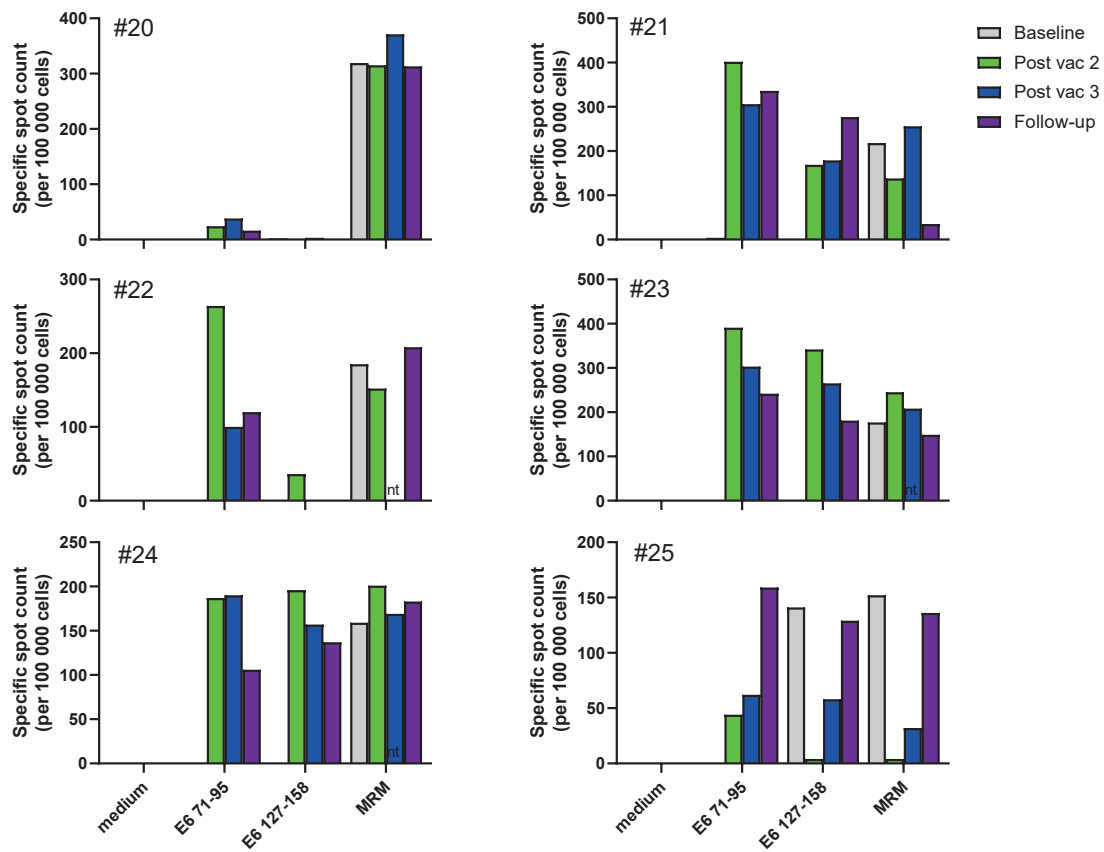

**Supplemental Figure 2:** The 4-day IFN $\gamma$  ELISpot results of patients from highest dose cohort. The specific number of spots per  $10^5$  cells is depicted for the patients in the highest dose cohort, except for patient #19 (see Figure 3).
