# Supplementary material for: Intradermal vaccination of HPV-16 E6 synthetic peptides conjugated to an optimized Toll-like receptor 2 ligand shows safety and potent T cell immunogenicity in patients with HPV-16 positive (pre-)malignant lesions
Source: PubMed Central journal article supplement — J Immunother Cancer. 2022 Oct 19;10(10):e005016. doi: 10.1136/jitc-2022-005016 (PMC9582304; doi:10.1136/jitc-2022-005016), 2022-10-19
Supplement: jitc-2022-005016supp004.pdf [file jitc-2022-005016supp004.pdf]

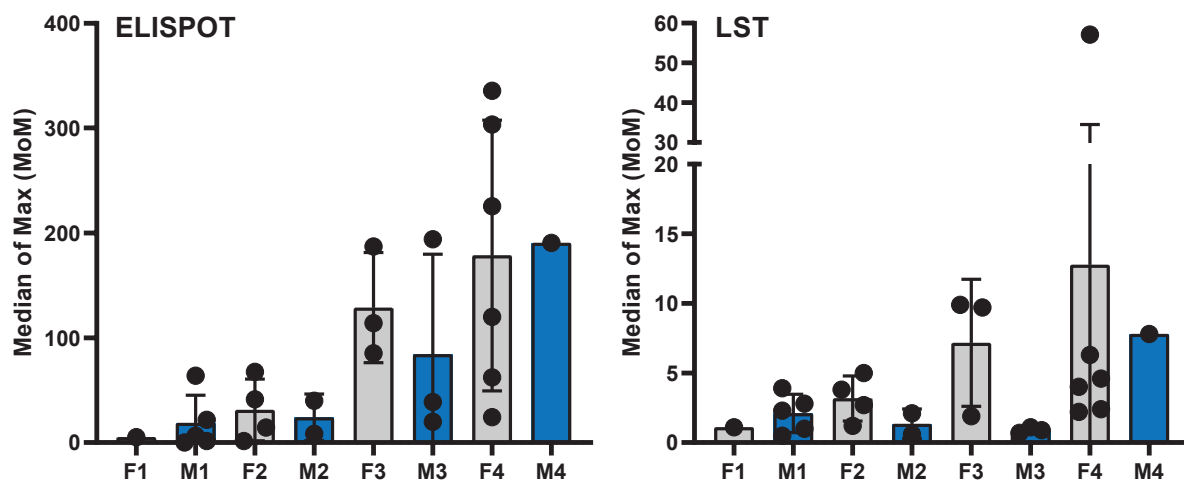

**Supplemental Figure 3:** No statistical differences in T cell responses due to gender. The medium of max (MoM, see methods) for the results obtained by (A) the 4-day IFN $\gamma$  ELISpot and (B) Lymphocyte Stimulation Test (LST) from female (F) and male (M) patients per dose cohort (indicated by the number) is depicted. As the female-male ratio in cohort 1 and 4 were unbalanced, only for dose cohorts 2 and 3 a statistical analysis (Mann Whitney test) could be performed, which resulted in no significant differences.
